# Supplementary material for: Seed dormancy types and germination characteristics of six plants in the dry-warm valley of Jinshajiang River, SW China
Source: PeerJ. 2025 Jun 18;13:e19559. doi: 10.7717/peerj.19559 (PMC12182050; doi:10.7717/peerj.19559)
Supplement: Supplemental Information 1 [file peerj-13-19559-s001.xlsx]

## Sheet: Sophora davidii
Sophora davidii
Temperature	Germination day	5℃						10℃						15℃						20℃						25℃						30℃						35℃						37℃
Fresh/DAR		Fresh			DAR			Fresh			DAR			Fresh			DAR			Fresh			DAR			Fresh			DAR			Fresh			DAR			Fresh			DAR			Fresh			DAR
GA3 Concentration		×			0			×			0			×			0			×			0			×			0			×			0			×			×			×			0
Repeat		1	2	3	1	2	3	1	2	3	1	2	3	1	2	3	1	2	3	1	2	3	1	2	3	1	2	3	1	2	3	1	2	3	1	2	3	1	2	3	1	2	3	1	2	3	1	2	3
Final germination(dark)
Total sample(dark)
Number of decay(dark)
Number of fresh(dark)
Empty flat number(dark)
Final germination(light)					0	1	0				13	7	8				14	6	11				6	11	7				8	9	10				7	9	4										0	0	0
Total sample(light)					12	9	8				13	7	8				14	6	11				6	11	7				8	9	10				8	10	4										10	10	10
Number of decay(light)																																			1	1											10	10	10
Number of fresh(light)					12	8
Empty flat number(light)
	1				0	0	0				0	0	0				0	0	0				1	0	0				1	0	0				0	1	1										0	0	0
	2				0	0	0				1	0	1				2	0	1				5	9	6				7	6	7				7	8	3										0	0	0
	3				0	0	0				0	1	1				2	3	2				end	2	1				end	3	3				0	0	end										0	0	0
	4				0	0	0				0	0	0				4	1	3					end	0					end	end				0	0											0	0	0
	5				0	0	0				0	1	1				6	2	4						end										0	0											0	0	0
	6				0	0	0				3	1	1				end	end	1																0	0											0	0	0
	7				0	0	0				4	3	1						end																0	0											0	0	0
	8				0	0	0				1	1	0																						0	0											0	0	0
	9				0	0	0				4	end	3																						0	0											0	0	0
	10				0	0	0				end		end																						0	0											0	0	0
	11				0	0	0																												0	0											0	0	0
	12				0	0	0																												0	0											0	0	0
	13				0	0	0																												0	0											0	0	0
	14				0	0	0																												0	0											0	0	0
	15				0	0	0																												0	0											0	0	0
	16				0	1	0																												0	0											0	0	0
	17				0	0	0																												0	0											0	0	0
	18				0	0	0																												0	0											0	0	0
	19				0	0	0																												0	0											0	0	0
	20				0	0	0																												0	0											0	0	0
	21				0	0	0																												0	0											0	0	0
	22				0	0	0																												0	0											0	0	0
	23				0	0	0																												0	0											0	0	0
	24				0	0	0																												0	0											0	0	0
	25				0	0	0																												0	0											0	0	0
	26				0	0	0																												0	0											0	0	0
	27				0	0	0																												0	0											0	0	0
	28				0	0	0																												0	0											0	0	0
	29				0	0	0																												0	0											0	0	0
	30				0	0	0																												0	0											0	0	0
	31				0	0	0																												0	0											0	0	0
	32				0	0	0																												0	0											0	0	0
	33				0	0	0																												0	0											0	0	0
	34				0	0	0																												0	0											0	0	0
	35				0	0	0																												0	0											0	0	0
	36				0	0	0																												0	0											0	0	0
	37				0	0	0																												0	0											0	0	0
	38				0	0	0																												0	0											0	0	0
	39				0	0	0																												0	0											0	0	0
	40				0	0	0																												0	0											0	0	0
	41				0	0	0																												0	0											0	0	0
	42				0	0	0																												0	0											0	0	0
[truncated: 18 more columns]

## Sheet: Sophora davidii (1)
the data on germination rate (1/t50) of Sophora davidii
Temperature	Germination day	5℃			10℃			15℃			20℃			25℃			30℃			35℃			37℃
Fresh/DAR		DAR			DAR			DAR			DAR			DAR			DAR			Fresh			DAR
Repeat		1	2	3	1	2	3	1	2	3	1	2	3	1	2	3	1	2	3	1	2	3	1	2	3
Final germination(light)		0	0	0	16	19	18	15	18	17	19	16	17	20	20	17	18	19	20	18	14	15	0	0	0
Total sample(light)		21	31	20	19	22	20	20	20	20	20	19	20	20	20	20	19	20	20	20	20	20	10	10	10
Number of decay(light)		16	19	6	3	3	2	5	2	3	1	3	3			3	1	1		2	6	5	10	10	10
Number of fresh(light)		5	12	14
Empty flat number(light)																	1
	1	0	0	0	0	0	0	0	0	0	0	0	0	0	0	0	0	0	0	0	0	0	0	0	0
	2	0	0	0	0	0	0	0	0	0	1	3	2	6	9	5	5	5	6	3	4	0	0	0	0
	3	0	0	0	0	0	0	1	0	0	15	10	12	13	10	8	10	12	14	0	0	3	0	0	0
	4	0	0	0	0	0	0	1	5	3	2	2	3	0	0	2	2	2	end	1	1	1	0	0	0
	5	0	0	0	0	0	0	10	11	10	1	1	0	1	0	0	1	0		14	8	10	0	0	0
	6	0	0	0	0	0	0	1	1	3	0	0	0	end	0	0	0	0		0	1	1	0	0	0
	7	0	0	0	1	2	2	0	0	1	0	0	0		1	2	0	0		0	0	0	0	0	0
	8	0	0	0	0	0	0	0	0	0	0	0	0		end	0	0	0		0	0	0	0	0	0
	9	0	0	0	0	0	0	0	0	0	0	0	0			0	0	0		0	0	0	0	0	0
	10	0	0	0	11	11	15	2	1	0	0	0	0			0	0	0		0	0	0	0	0	0
	11	0	0	0	3	2	1	0	0	0	0	0	0			0	0	0		0	0	0	0	0	0
	12	0	0	0	1	4	0	0	0	0	0	0	0			0	0	0		0	0	0	0	0	0
	13	0	0	0	0	0	0	0	0	0	0	0	0			0	0	0		0	0	0	0	0	0
	14	0	0	0	0	0	0	0	0	0	0	0	0			0	0	0		0	0	0	0	0	0
	15	0	0	0	0	0	0	0	0	0	0	0	0			0	0	0		0	0	0	0	0	0
	16	0	0	0	0	0	0	0	0	0	0	0	0			0	0	0		0	0	0	0	0	0
	17	0	0	0	0	0	0	0	0	0	0	0	0			0	0	0		0	0	0	0	0	0
	18	0	0	0	0	0	0	0	0	0	0	0	0			0	0	0		0	0	0	0	0	0
	19	0	0	0	0	0	0	0	0	0	0	0	0			0	0	0		0	0	0	0	0	0
	20	0	0	0	0	0	0	0	0	0	0	0	0			0	0	0		0	0	0	0	0	0
	21	0	0	0	0	0	0	0	0	0	0	0	0			0	0	0		0	0	0	0	0	0
	22	0	0	0	0	0	0	0	0	0	0	0	0			0	0	0		0	0	0	0	0	0
	23	0	0	0	0	0	0	0	0	0	0	0	0			0	0	0		0	0	0	0	0	0
	24	0	0	0	0	0	0	0	0	0	0	0	0			0	0	0		0	0	0	0	0	0
	25	0	0	0	0	0	0	0	0	0	0	0	0			0	0	0		0	0	0	0	0	0
	26	0	0	0	0	0	0	0	0	0	0	0	0			0	0	0		0	0	0	0	0	0
	27	0	0	0	0	0	0	0	0	0	0	0	0			0	0	0		0	0	0	0	0	0
	28	0	0	0	0	0	0	0	0	0	0	0	0			0	0	0		0	0	0	0	0	0
	29	0	0	0	0	0	0	0	0	0	0	0	0			0	0	0		0	0	0	0	0	0
	30	0	0	0	0	0	0	0	0	0	0	0	0			0	0	0		0	0	0	0	0	0
	31	0	0	0	0	0	0	0	0	0	0	0	0			0	0	0		0	0	0	0	0	0
	32	0	0	0	0	0	0	0	0	0	0	0	0			0	0	0		0	0	0	0	0	0
	33	0	0	0	0	0	0	0	0	0	0	0	0			0	0	0		0	0	0	0	0	0
	34	0	0	0	0	0	0	0	0	0	0	0	0			0	0	0		0	0	0	0	0	0
	35	0	0	0	0	0	0	0	0	0	0	0	0			0	0	0		0	0	0	0	0	0
	36	0	0	0	0	0	0	0	0	0	0	0	0			0	0	0		0	0	0	0	0	0
	37	0	0	0	0	0	0	0	0	0	0	0	0			0	0	0		0	0	0	0	0	0
	38	0	0	0	0	0	0	0	0	0	0	0	0			0	0	0		0	0	0	0	0	0
	39	0	0	0	0	0	0	0	0	0	0	0	0			0	0	0		0	0	0	0	0	0
	40	0	0	0	0	0	0	0	0	0	0	0	0			0	0	0		0	0	0	0	0	0
	41	0	0	0	0	0	0	0	0	0	0	0	0			0	0	0		0	0	0	0	0	0
	42	0	0	0	0	0	0	0	0	0	0	0	0			0	0	0		0	0	0	0	0	0

## Sheet: Osteomeles schwerinae
Osteomeles schwerinae
Temperature	Germination day	5℃						10℃						15℃						20℃						25℃						30℃						35℃						37℃
Fresh/DAR		Fresh			DAR			Fresh			DAR			Fresh			DAR			Fresh			DAR			Fresh			DAR			Fresh			DAR			Fresh			DAR			Fresh			DAR
GA3 Concentration		×			0			×			0			×			0			×			0			×			0			×			0			×			0			×			×
Repeat		1	2	3	1	2	3	1	2	3	1	2	3	1	2	3	1	2	3	1	2	3	1	2	3	1	2	3	1	2	3	1	2	3	1	2	3	1	2	3	1	2	3	1	2	3	1	2	3
Final germination(dark)
Total sample(dark)
Number of decay(dark)
Number of fresh(dark)
Empty flat number(dark)
Final germination(light)					0	0	0				17	16	12				18	18	16				16	18	18				13	18	16				10	6	12				0	0	0
Total sample(light)					20	19	20				20	18	17				19	20	17				18	18	19				20	20	19				19	19	19				20	20	20
Number of decay(light)					1						1												1		1				2	1	1				5	4	6				18	17	16
Number of fresh(light)					19	19	20				2	2	5				1	2	1				1						5	1	2				4	8	1				2	3	4
Empty flat number(light)						1						2	3				1		3				2	2	1										1	1	1
	1				0	0	0				0	0	0				0	0	0				0	0	0				0	0	0				0	0	0				0	0	0
	2				0	0	0				0	0	0				0	0	0				0	0	0				0	0	0				0	0	0				0	0	0
	3				0	0	0				0	0	0				0	0	0				0	0	0				0	0	0				0	0	0				0	0	0
	4				0	0	0				0	0	0				0	0	0				0	0	0				0	0	0				0	0	0				0	0	0
	5				0	0	0				0	0	0				0	0	0				0	0	0				0	0	0				0	0	0				0	0	0
	6				0	0	0				0	0	0				0	0	0				0	0	0				0	0	0				0	0	0				0	0	0
	7				0	0	0				0	0	0				0	0	0				0	0	1				1	1	0				0	0	0				0	0	0
	8				0	0	0				0	0	0				0	0	0				1	1	1				0	1	0				0	0	0				0	0	0
	9				0	0	0				0	0	0				0	0	0				4	2	3				0	1	1				0	0	0				0	0	0
	10				0	0	0				0	0	0				0	0	0				1	0	1				0	0	0				0	0	2				0	0	0
	11				0	0	0				0	0	0				1	2	0				4	5	3				2	2	1				0	0	0				0	0	0
	12				0	0	0				0	0	0				1	0	2				1	0	1				1	2	1				0	0	0				0	0	0
	13				0	0	0				0	0	0				0	0	1				1	0	2				1	2	1				0	0	1				0	0	0
	14				0	0	0				0	0	0				1	0	1				1	1	1				1	0	0				0	0	0				0	0	0
	15				0	0	0				0	0	0				1	0	1				1	0	0				0	2	0				2	0	0				0	0	0
	16				0	0	0				0	0	0				0	3	0				0	1	2				0	1	1				1	0	1				0	0	0
	17				0	0	0				1	0	0				1	1	0				0	0	0				1	1	0				1	0	0				0	0	0
	18				0	0	0				1	1	3				3	1	0				2	1	0				0	1	1				0	1	1				0	0	0
	19				0	0	0				1	1	1				0	1	1				0	0	0				2	2	2				0	0	0				0	0	0
	20				0	0	0				0	1	0				2	1	1				0	1	0				1	0	0				0	0	0				0	0	0
	21				0	0	0				0	0	1				1	0	2				0	0	0				1	0	0				1	1	0				0	0	0
	22				0	0	0				0	0	0				1	0	1				0	1	1				0	0	0				0	0	0				0	0	0
	23				0	0	0				0	2	0				1	1	1				0	1	0				0	0	3				0	1	1				0	0	0
	24				0	0	0				0	1	1				2	1	0				0	1	1				1	1	1				0	0	1				0	0	0
	25				0	0	0				0	0	0				0	0	0				0	0	0				0	0	0				0	0	0				0	0	0
	26				0	0	0				0	0	0				0	0	0				0	0	0				0	0	0				0	0	0				0	0	0
	27				0	0	0				0	0	0				0	0	0				0	0	0				0	0	0				0	0	0				0	0	0
	28				0	0	0				0	0	0				0	0	0				0	0	0				0	0	0				0	0	0				0	0	0
	29				0	0	0				1	2	2				1	3	3				0	1	1				1	1	3				3	1	2				0	0	0
	30				0	0	0				0	0	0				0	0	0				0	0	0				0	0	0				0	0	0				0	0	0
	31				0	0	0				0	0	0				0	0	0				0	0	0				0	0	0				0	0	0				0	0	0
	32				0	0	0				0	0	0				0	0	0				0	0	0				0	0	0				0	0	0				0	0	0
	33				0	0	0				0	0	0				0	0	0				0	0	0				0	0	0				0	0	0				0	0	0
	34				0	0	0				2	2	1				2	4	2				0	2	0				0	0	1				2	2	3				0	0	0
	35				0	0	0				0	0	0				0	0	0				0	end	0				0	0	0				0	0	0				0	0	0
	36				0	0	0				0	0	0				0	0	0				0		0				0	0	0				0	0	0				0	0	0
	37				0	0	0				0	0	0				0	0	0				0		0				0	0	0				0	0	0				0	0	0
	38				0	0	0				0	0	0				0	0	0				0		0				0	0	0				0	0	0				0	0	0
	39				0	0	0				0	0	0				0	0	0				0		0				0	0	0				0	0	0				0	0	0
	40				0	0	0				0	0	0				0	0	0				0		0				0	0	0				0	0	0				0	0	0
	41				0	0	0				0	0	0				0	0	0				0		0				0	0	0				0	0	0				0	0	0
	42				0	0	0				11	6	3				0	0	0				0		0				0	0	0				0	0	0				0	0	0
[truncated: 18 more columns]

## Sheet: Excoecaria acerifolia 
Excoecaria acerifolia
Temperature	Germination day	5℃						10℃						15℃						20℃						25℃						30℃						35℃						37℃
Fresh/DAR		Fresh			DAR			Fresh			DAR			Fresh			DAR			Fresh			DAR			Fresh			DAR			Fresh			DAR			Fresh			DAR			Fresh			DAR
GA3 Concentration		×			0			×			0			×			0			×			0			×			0			×			0			×			0			×			0
Repeat		1	2	3	1	2	3	1	2	3	1	2	3	1	2	3	1	2	3	1	2	3	1	2	3	1	2	3	1	2	3	1	2	3	1	2	3	1	2	3	1	2	3	1	2	3	1	2	3
Final germination(dark)
Total sample(dark)
Number of decay(dark)
Number of fresh(dark)
Empty flat number(dark)
Final germination(light)					0	0	0				6	7	7				14	14	10				15	13	14				14	14	15				14	15	16				11	8	10				0	0	0
Total sample(light)					15	15	15				13	15	15				15	14	12				15	15	15				15	14	15				14	15	16				15	15	15				10	10	10
Number of decay(light)					1		1				1		1				1		2					2	1				1						1						4	7	5				10	10	10
Number of fresh(light)					14	15	14				6	8	4
Empty flat number(light)													3					1												1
	1				0	0	0				0	0	0				0	0	0				0	0	0				0	0	0				0	0	0				0	0	0				0	0	0
	2				0	0	0				0	0	0				0	0	0				0	0	0				0	1	0				0	0	0				0	0	0				0	0	0
	3				0	0	0				0	0	0				0	0	0				5	4	2				12	11	15				8	9	8				1	0	0				0	0	0
	4				0	0	0				0	0	0				0	0	0				8	5	10				0	1	end				2	4	6				1	1	1				0	0	0
	5				0	0	0				0	0	0				0	1	0				2	1	2				0	1					1	2	0				1	0	3				0	0	0
	6				0	0	0				0	0	0				3	0	0				end	3	0				1	end					1	end	1				2	2	0				0	0	0
	7				0	0	0				0	0	1				0	1	0					0	0				1						2		1				0	1	0				0	0	0
	8				0	0	0				0	0	0				0	2	3					0	0				0						end		end				2	2	0				0	0	0
	9				0	0	0				0	0	0				1	2	2					0	0				0												1	0	1				0	0	0
	10				0	0	0				0	0	1				3	2	0					0	0				0												1	1	3				0	0	0
	11				0	0	0				0	0	0				4	3	1										0												2	1	2				0	0	0
	12				0	0	0				1	0	0				0	1	0										0												0	0	0				0	0	0
	13				0	0	0				1	0	0				0	0	0										0												0	0	0				0	0	0
	14				0	0	0				1	0	0				1	0	1										0												0	0	0				0	0	0
	15				0	0	0				0	0	0				1	2	1										0												0	0	0				0	0	0
	16				0	0	0				0	0	0				1	end	1										0												0	0	0				0	0	0
	17				0	0	0				0	1	0				0		0										0												0	0	0				0	0	0
	18				0	0	0				0	0	0				0		0										0												0	0	0				0	0	0
	19				0	0	0				0	0	0				0		0										0												0	0	0				0	0	0
	20				0	0	0				0	0	0				0		0										0												0	0	0				0	0	0
	21				0	0	0				1	0	0				0		0										0												0	0	0				0	0	0
	22				0	0	0				0	0	0				0		1										0												0	0	0				0	0	0
	23				0	0	0				0	1	2				0		0										0												0	0	0				0	0	0
	24				0	0	0				0	1	1				0		0										0												0	0	0				0	0	0
	25				0	0	0				0	0	0				0		0										0												0	0	0				0	0	0
	26				0	0	0				0	0	0				0		0										0												0	0	0				0	0	0
	27				0	0	0				0	0	0				0		0										0												0	0	0				0	0	0
	28				0	0	0				0	0	0				0		0										0												0	0	0				0	0	0
	29				0	0	0				2	1	2				0		0										0												0	0	0				0	0	0
	30				0	0	0				0	0	0				0		0										0												0	0	0				0	0	0
	31				0	0	0				0	0	0				0		0										0												0	0	0				0	0	0
	32				0	0	0				0	0	0				0		0										0												0	0	0				0	0	0
	33				0	0	0				0	3	0				0		0										0												0	0	0				0	0	0
	34				0	0	0				0	0	0				0		0										0												0	0	0				0	0	0
	35				0	0	0				0	0	0				0		0										0												0	0	0				0	0	0
	36				0	0	0				0	0	0				0		0										0												0	0	0				0	0	0
	37				0	0	0				0	0	0				0		0										0												0	0	0				0	0	0
	38				0	0	0				0	0	0				0		0										0												0	0	0				0	0	0
	39				0	0	0				0	0	0				0		0										0												0	0	0				0	0	0
	40				0	0	0				0	0	0				0		0										0												0	0	0				0	0	0
	41				0	0	0				0	0	0				0		0										0												0	0	0				0	0	0
	42				0	0	0				0	0	0				0		0										0												0	0	0				0	0	0
[truncated: 18 more columns]

## Sheet: Leonurus japonicus 
Leonurus japonicus
Temperature	Germination day	5℃						10℃						15℃						20℃						25℃						30℃						35℃						37℃
Fresh/DAR		Fresh			DAR			Fresh			DAR			Fresh			DAR			Fresh			DAR			Fresh			DAR			Fresh			DAR			Fresh			DAR			Fresh			DAR
GA3 Concentration		×			0			×			0			×			0			×			0			×			0			×			0			×			0			×			0
Repeat		1	2	3	1	2	3	1	2	3	1	2	3	1	2	3	1	2	3	1	2	3	1	2	3	1	2	3	1	2	3	1	2	3	1	2	3	1	2	3	1	2	3	1	2	3	1	2	3
Final germination(dark)
Total sample(dark)
Number of decay(dark)
Number of fresh(dark)
Empty flat number(dark)
Final germination(light)					0	0	0				10	17	17				15	16	18				18	19	19				16	18	18				14	15	15				14	15	14				0	0	0
Total sample(light)					20	20	20				18	19	20				20	18	19				20	19	19				19	20	20				20	20	19				20	20	19				20	20	20
Number of decay(light)													1				1	2					1						2	2	2				1	2	2					1					20	20	20
Number of fresh(light)					20	20	20				7	2	2				4		1				1						1						5	3	2				6	4	5
Empty flat number(light)											2							2	1					1	1				1								1						1
	1				0	0	0				0	0	0				0	0	0				0	0	0				0	0	0				0	0	0				0	0	0				0	0	0
	2				0	0	0				0	0	0				0	0	0				0	0	0				0	0	0				2	1	3				0	0	1				0	0	0
	3				0	0	0				0	0	0				0	0	0				0	0	0				15	16	16				11	13	9				8	10	11				0	0	0
	4				0	0	0				0	0	0				0	0	0				16	19	19				1	2	2				1	1	2				2	3	2				0	0	0
	5				0	0	0				0	0	0				0	0	0				0	end	end				0	0	0				0	0	0				1	1	0				0	0	0
	6				0	0	0				0	0	0				4	4	7				0						0	0	0				0	0	0				0	0	0				0	0	0
	7				0	0	0				0	0	0				9	9	11				1						0	0	0				0	0	0				2	0	0				0	0	0
	8				0	0	0				1	5	2				1	2	0				0						0	0	0				0	0	1				1	1	0				0	0	0
	9				0	0	0				1	3	5				0	1	0				0						0	0	0				0	0	0				0	0	0				0	0	0
	10				0	0	0				4	5	7				0	0	0				0						0	0	0				0	0	0				0	0	0				0	0	0
	11				0	0	0				1	2	2				1	0	0				1						0	0	0				0	0	0				0	0	0				0	0	0
	12				0	0	0				0	1	1				0	0	0				0						0	0	0				0	0	0				0	0	0				0	0	0
	13				0	0	0				0	0	0				0	0	0				0						0	0	0				0	0	0				0	0	0				0	0	0
	14				0	0	0				2	1	0				0	0	0				0						0	0	0				0	0	0				0	0	0				0	0	0
	15				0	0	0				1	0	0				0	0	0				0						0	0	0				0	0	0				0	0	0				0	0	0
	16				0	0	0				0	0	0				0	0	0				0						0	0	0				0	0	0				0	0	0				0	0	0
	17				0	0	0				0	0	0				0	0	0				0						0	0	0				0	0	0				0	0	0				0	0	0
	18				0	0	0				0	0	0				0	0	0				0						0	0	0				0	0	0				0	0	0				0	0	0
	19				0	0	0				0	0	0				0	0	0				0						0	0	0				0	0	0				0	0	0				0	0	0
	20				0	0	0				0	0	0				0	0	0				0						0	0	0				0	0	0				0	0	0				0	0	0
	21				0	0	0				0	0	0				0	0	0				0						0	0	0				0	0	0				0	0	0				0	0	0
	22				0	0	0				0	0	0				0	0	0				0						0	0	0				0	0	0				0	0	0				0	0	0
	23				0	0	0				0	0	0				0	0	0				0						0	0	0				0	0	0				0	0	0				0	0	0
	24				0	0	0				0	0	0				0	0	0				0						0	0	0				0	0	0				0	0	0				0	0	0
	25				0	0	0				0	0	0				0	0	0				0						0	0	0				0	0	0				0	0	0				0	0	0
	26				0	0	0				0	0	0				0	0	0				0						0	0	0				0	0	0				0	0	0				0	0	0
	27				0	0	0				0	0	0				0	0	0				0						0	0	0				0	0	0				0	0	0				0	0	0
	28				0	0	0				0	0	0				0	0	0				0						0	0	0				0	0	0				0	0	0				0	0	0
	29				0	0	0				0	0	0				0	0	0				0						0	0	0				0	0	0				0	0	0				0	0	0
	30				0	0	0				0	0	0				0	0	0				0						0	0	0				0	0	0				0	0	0				0	0	0
	31				0	0	0				0	0	0				0	0	0				0						0	0	0				0	0	0				0	0	0				0	0	0
	32				0	0	0				0	0	0				0	0	0				0						0	0	0				0	0	0				0	0	0				0	0	0
	33				0	0	0				0	0	0				0	0	0				0						0	0	0				0	0	0				0	0	0				0	0	0
	34				0	0	0				0	0	0				0	0	0				0						0	0	0				0	0	0				0	0	0				0	0	0
	35				0	0	0				0	0	0				0	0	0				0						0	0	0				0	0	0				0	0	0				0	0	0
	36				0	0	0				0	0	0				0	0	0				0						0	0	0				0	0	0				0	0	0				0	0	0
	37				0	0	0				0	0	0				0	0	0				0						0	0	0				0	0	0				0	0	0				0	0	0
	38				0	0	0				0	0	0				0	0	0				0						0	0	0				0	0	0				0	0	0				0	0	0
	39				0	0	0				0	0	0				0	0	0				0						0	0	0				0	0	0				0	0	0				0	0	0
	40				0	0	0				0	0	0				0	0	0				0						0	0	0				0	0	0				0	0	0				0	0	0
	41				0	0	0				0	0	0				0	0	0				0						0	0	0				0	0	0				0	0	0				0	0	0
	42				0	0	0				0	0	0				0	0	0				0						0	0	0				0	0	0				0	0	0				0	0	0
[truncated: 18 more columns]

## Sheet: Incarvillea arguta 
Incarvillea arguta
Temperature	Germination day	5℃						10℃						15℃						20℃						25℃						30℃						35℃						37℃
Fresh/DAR		Fresh			DAR			Fresh			DAR			Fresh			DAR			Fresh			DAR			Fresh			DAR			Fresh			DAR			Fresh			DAR			Fresh			DAR
GA3 Concentration		×			0			×			0			×			0			×			0			×			0			×			0			×			0			×			0
Repeat		1	2	3	1	2	3	1	2	3	1	2	3	1	2	3	1	2	3	1	2	3	1	2	3	1	2	3	1	2	3	1	2	3	1	2	3	1	2	3	1	2	3	1	2	3	1	2	3
Final germination(dark)
Total sample(dark)
Number of decay(dark)
Number of fresh(dark)
Empty flat number(dark)
Final germination(light)					0	0	0				15	11	16				18	16	15				19	19	12				15	19	13				15	17	14				6	9	13				0	0	0
Total sample(light)					20	20	20				16	13	18				19	17	19				20	19	16				18	19	17				18	19	18				18	20	19				20	20	20
Number of decay(light)					3	5	4				1	2	2				1	1	4				1		4				3		4				3	2	4				12	11	6				20	20	20
Number of fresh(light)					17	15	16
Empty flat number(light)											5	7	2				1	4	2					1	4				3	1	3				2	1	2				2		2
	1				0	0	0				0	0	0				0	0	0				0	0	0				0	0	0				0	0	0				0	0	0				0	0	0
	2				0	0	0				0	0	0				0	0	0				0	0	0				5	7	3				3	9	9				0	0	1				0	0	0
	3				0	0	0				0	0	0				0	0	0				15	15	10				9	12	10				7	4	5				1	2	3				0	0	0
	4				0	0	0				0	0	0				3	4	5				3	4	2				1	end	0				5	4	0				1	4	3				0	0	0
	5				0	0	0				0	0	0				6	7	5				1	end	0				0		0				0	0	0				1	0	1				0	0	0
	6				0	0	0				1	5	5				6	5	3				0		0				0		0				0	0	0				1	0	1				0	0	0
	7				0	0	0				6	0	6				2	0	1				0		0				0		0				0	0	0				2	2	1				0	0	0
	8				0	0	0				6	1	2				0	0	0				0		0				0		0				0	0	0				0	0	3				0	0	0
	9				0	0	0				1	1	2				1	0	1				0		0				0		0				0	0	0				0	0	0				0	0	0
	10				0	0	0				1	2	0				0	0	0				0		0				0		0				0	0	0				0	1	0				0	0	0
	11				0	0	0				0	2	0				0	0	0				0		0				0		0				0	0	0				0	0	0				0	0	0
	12				0	0	0				0	0	1				0	0	0				0		0				0		0				0	0	0				0	0	0				0	0	0
	13				0	0	0				0	0	0				0	0	0				0		0				0		0				0	0	0				0	0	0				0	0	0
	14				0	0	0				0	0	0				0	0	0				0		0				0		0				0	0	0				0	0	0				0	0	0
	15				0	0	0				0	0	0				0	0	0				0		0				0		0				0	0	0				0	0	0				0	0	0
	16				0	0	0				0	0	0				0	0	0				0		0				0		0				0	0	0				0	0	0				0	0	0
	17				0	0	0				0	0	0				0	0	0				0		0				0		0				0	0	0				0	0	0				0	0	0
	18				0	0	0				0	0	0				0	0	0				0		0				0		0				0	0	0				0	0	0				0	0	0
	19				0	0	0				0	0	0				0	0	0				0		0				0		0				0	0	0				0	0	0				0	0	0
	20				0	0	0				0	0	0				0	0	0				0		0				0		0				0	0	0				0	0	0				0	0	0
	21				0	0	0				0	0	0				0	0	0				0		0				0		0				0	0	0				0	0	0				0	0	0
	22				0	0	0				0	0	0				0	0	0				0		0				0		0				0	0	0				0	0	0				0	0	0
	23				0	0	0				0	0	0				0	0	0				0		0				0		0				0	0	0				0	0	0				0	0	0
	24				0	0	0				0	0	0				0	0	0				0		0				0		0				0	0	0				0	0	0				0	0	0
	25				0	0	0				0	0	0				0	0	0				0		0				0		0				0	0	0				0	0	0				0	0	0
	26				0	0	0				0	0	0				0	0	0				0		0				0		0				0	0	0				0	0	0				0	0	0
	27				0	0	0				0	0	0				0	0	0				0		0				0		0				0	0	0				0	0	0				0	0	0
	28				0	0	0				0	0	0				0	0	0				0		0				0		0				0	0	0				0	0	0				0	0	0
	29				0	0	0				0	0	0				0	0	0				0		0				0		0				0	0	0				0	0	0				0	0	0
	30				0	0	0				0	0	0				0	0	0				0		0				0		0				0	0	0				0	0	0				0	0	0
	31				0	0	0				0	0	0				0	0	0				0		0				0		0				0	0	0				0	0	0				0	0	0
	32				0	0	0				0	0	0				0	0	0				0		0				0		0				0	0	0				0	0	0				0	0	0
	33				0	0	0				0	0	0				0	0	0				0		0				0		0				0	0	0				0	0	0				0	0	0
	34				0	0	0				0	0	0				0	0	0				0		0				0		0				0	0	0				0	0	0				0	0	0
	35				0	0	0				0	0	0				0	0	0				0		0				0		0				0	0	0				0	0	0				0	0	0
	36				0	0	0				0	0	0				0	0	0				0		0				0		0				0	0	0				0	0	0				0	0	0
	37				0	0	0				0	0	0				0	0	0				0		0				0		0				0	0	0				0	0	0				0	0	0
	38				0	0	0				0	0	0				0	0	0				0		0				0		0				0	0	0				0	0	0				0	0	0
	39				0	0	0				0	0	0				0	0	0				0		0				0		0				0	0	0				0	0	0				0	0	0
	40				0	0	0				0	0	0				0	0	0				0		0				0		0				0	0	0				0	0	0				0	0	0
	41				0	0	0				0	0	0				0	0	0				0		0				0		0				0	0	0				0	0	0				0	0	0
	42				0	0	0				0	0	0				0	0	0				0		0				0		0				0	0	0				0	0	0				0	0	0
[truncated: 18 more columns]

## Sheet: Berberis concolor
Berberis concolor
Temperature	Germination day	5℃						10℃						15℃						20℃						25℃						30℃						35℃						37℃
Fresh/DAR		Fresh			DAR			Fresh			DAR			Fresh			DAR			Fresh			DAR			Fresh			DAR			Fresh			DAR			Fresh			DAR			Fresh			DAR
GA3 Concentration		×			0			×			0			×			0			×			0			×			0			×			0			×			0			×			×
Repeat		1	2	3	1	2	3	1	2	3	1	2	3	1	2	3	1	2	3	1	2	3	1	2	3	1	2	3	1	2	3	1	2	3	1	2	3	1	2	3	1	2	3	1	2	3	1	2	3
Final germination(dark)
Total sample(dark)
Number of decay(dark)
Number of fresh(dark)
Empty flat number(dark)
Final germination(light)					1	0	3				7	9	8				8	3	7				6	4	7				7	3	7				2	5	5				0	0	0
Total sample(light)					13	10	8				10	10	13				13	17	15				9	9	13				10	15	12				10	9	11				20	20	20
Number of decay(light)											3	1	5				4	14	8				3	5	6				3	12	5				8	4	6				20	20	20
Number of fresh(light)					12	10	5										1
Empty flat number(light)					8	10	12				9	10	7				6	3	5				11	11	8				7	6	8				9	11	9
	1				0	0	0				0	0	0				0	0	0				0	0	0				0	0	0				0	0	0				0	0	0
	2				0	0	0				0	0	0				0	0	0				0	0	0				0	0	0				0	0	0				0	0	0
	3				0	0	0				0	0	0				0	0	0				0	0	0				0	0	0				0	0	0				0	0	0
	4				0	0	0				0	0	0				0	0	0				0	0	0				0	0	0				0	0	0				0	0	0
	5				0	0	0				0	0	0				0	0	0				0	0	0				0	0	0				0	0	0				0	0	0
	6				0	0	0				0	0	0				0	0	0				0	0	0				0	0	0				0	0	0				0	0	0
	7				0	0	0				0	0	0				0	0	0				0	0	0				1	0	0				0	0	0				0	0	0
	8				0	0	0				0	0	0				0	0	0				1	1	0				1	1	0				0	0	0				0	0	0
	9				0	0	0				0	0	0				0	0	0				0	0	1				1	1	1				0	0	0				0	0	0
	10				0	0	0				0	0	0				2	1	2				1	0	1				0	0	0				0	0	0				0	0	0
	11				0	0	0				0	0	0				3	2	1				1	1	1				1	0	0				0	0	0				0	0	0
	12				0	0	0				0	0	0				1	0	1				0	0	1				1	1	0				1	1	1				0	0	0
	13				0	0	0				0	1	0				2	0	0				0	0	0				1	0	1				0	0	1				0	0	0
	14				0	0	0				1	1	0				0	0	1				1	1	1				0	0	2				0	0	1				0	0	0
	15				0	0	0				1	1	1				0	0	0				1	1	0				0	0	1				0	2	1				0	0	0
	16				0	0	0				1	2	0				0	0	1				1	0	1				0	0	1				0	1	1				0	0	0
	17				0	0	0				0	1	1				0	0	0				0	0	0				1	0	0				0	0	0				0	0	0
	18				0	0	0				1	1	2				0	0	0				0	0	1				0	0	1				0	0	0				0	0	0
	19				0	0	0				0	1	2				0	0	0				0	0	0				0	0	0				0	0	0				0	0	0
	20				0	0	0				0	0	0				0	0	0				0	0	0				0	0	0				0	0	0				0	0	0
	21				0	0	0				1	0	0				0	0	1				0	0	0				0	0	0				1	0	0				0	0	0
	22				0	0	0				0	0	0				0	0	0				0	0	0				0	0	0				0	1	0				0	0	0
	23				0	0	0				1	0	1				0	0	0				0	0	0				0	0	0				0	0	0				0	0	0
	24				0	0	0				0	1	0				0	0	0				0	0	0				0	0	0				0	0	0				0	0	0
	25				0	0	0				0	0	0				0	0	0				0	0	0				0	0	0				0	0	0				0	0	0
	26				0	0	0				0	0	0				0	0	0				0	0	0				0	0	0				0	0	0				0	0	0
	27				0	0	0				0	0	0				0	0	0				0	0	0				0	0	0				0	0	0				0	0	0
	28				0	0	0				0	0	0				0	0	0				0	0	0				0	0	0				0	0	0				0	0	0
	29				0	0	0				0	0	0				0	0	0				0	0	0				0	0	0				0	0	0				0	0	0
	30				0	0	0				0	0	0				0	0	0				0	0	0				0	0	0				0	0	0				0	0	0
	31				0	0	0				0	0	0				0	0	0				0	0	0				0	0	0				0	0	0				0	0	0
	32				0	0	0				0	0	0				0	0	0				0	0	0				0	0	0				0	0	0				0	0	0
	33				0	0	0				0	0	0				0	0	0				0	0	0				0	0	0				0	0	0				0	0	0
	34				0	0	0				0	0	0				0	0	0				0	0	0				0	0	0				0	0	0				0	0	0
	35				0	0	0				0	0	0				0	0	0				0	0	0				0	0	0				0	0	0				0	0	0
	36				0	0	0				0	0	0				0	0	0				0	0	0				0	0	0				0	0	0				0	0	0
	37				0	0	0				0	0	0				0	0	0				0	0	0				0	0	0				0	0	0				0	0	0
	38				0	0	0				0	0	0				0	0	0				0	0	0				0	0	0				0	0	0				0	0	0
	39				0	0	0				0	0	0				0	0	0				0	0	0				0	0	0				0	0	0				0	0	0
	40				0	0	0				0	0	0				0	0	0				0	0	0				0	0	0				0	0	0				0	0	0
	41				0	0	0				0	0	0				0	0	0				0	0	0				0	0	0				0	0	0				0	0	0
	42				0	0	0				0	0	0				0	0	0				0	0	0				0	0	0				0	0	0				0	0	0
[truncated: 18 more columns]
