# Supplementary material for: Seed dormancy types and germination characteristics of six plants in the dry-warm valley of Jinshajiang River, SW China
Source: PeerJ. 2025 Jun 18;13:e19559. doi: 10.7717/peerj.19559 (PMC12182050; doi:10.7717/peerj.19559)
Supplement: Supplemental Information 2 [file peerj-13-19559-s002.xlsx]

## Sheet: Sophora davidii 
Sophora davidii		imbibition weight (g)
number	time (h)	A	B	C
1	0	0.1594	0.1647	0.1599
2	2	0.1623	0.1665	0.1644
3	4	0.1611	0.1666	0.1644
4	6	0.1618	0.1664	0.1671
5	8	0.1627	0.1667	0.1676
6	10	0.1624	0.1671	0.1672
7	12	0.1621	0.1678	0.1674
8	24	0.1635	0.1666	0.1684
9	36	0.1677	0.1682	0.1678
10	48	0.1677	0.1675	0.1681
11	60	0.1673	0.1682	0.1677
12	72	0.1677	0.1675	0.1677

## Sheet: Sophora davidii Seed coat cut
Sophora davidii Seed coat cut		imbibition weight (g)
number	time (h)	A	B	C
1	0	0.1232	0.1516	0.1012
2	2	0.2147	0.2292	0.1895
3	4	0.2241	0.2363	0.1966
4	6	0.2269	0.2405	0.2008
5	8	0.2317	0.2478	0.2028
6	10	0.2329	0.2479	0.2042
7	12	0.2334	0.2499	0.2075
8	24	0.2343	0.2613	0.2079
9	36	0.2329	0.2602	0.2085
10	48	0.2336	0.259	0.2074
11	60	0.2322	0.261	0.2083
12	72	0.2348	0.2616	0.2088

## Sheet: Osteomeles schwerinae
Osteomeles schwerinae		imbibition weight (g)
number	time (h)	A	B	C
1	0	0.0639	0.0665	0.0686
2	2	0.0738	0.0735	0.077
3	4	0.0756	0.0771	0.0798
4	6	0.0762	0.0754	0.0802
5	8	0.0768	0.0784	0.0804
6	10	0.0772	0.0781	0.0819
7	12	0.0761	0.0816	0.0821
8	24	0.0793	0.0876	0.0844
9	36	0.0815	0.0914	0.0861
10	48	0.0815	0.0917	0.0865
11	60	0.0818	0.0898	0.0871
12	72	0.0834	0.0928	0.0875

## Sheet: Excoecaria acerifolia 
Excoecaria acerifolia		imbibition weight (g)
number	time (h)	A	B	C
1	0	0.1699	0.2042	0.1915
2	2	0.205	0.2438	0.2247
3	4	0.2108	0.2541	0.2169
4	6	0.2147	0.2602	0.2219
5	8	0.2254	0.2736	0.2468
6	10	0.2309	0.2843	0.2557
7	12	0.2505	0.2983	0.2711
8	24	0.2905	0.3383	0.3149
9	36	0.2998	0.3243	0.3001
10	48	0.3162	0.3643	0.3293
11	60	0.3203	0.3737	0.342
12	72	0.3161	0.3651	0.3412

## Sheet: Leonurus japonicus 
Leonurus japonicus		imbibition weight (g)
number	time (h)	A	B	C
1	0	0.0132	0.0124	0.0125
2	2	0.0156	0.014	0.0144
3	4	0.015	0.0151	0.0146
4	6	0.0163	0.0157	0.0162
5	8	0.0173	0.0176	0.0175
6	10	0.0192	0.0188	0.0186
7	12	0.0201	0.0198	0.0202
8	24	0.0226	0.023	0.0215
9	36	0.0232	0.0249	0.0201
10	48	0.0217	0.0245	0.025
11	60	0.0216	0.0258	0.023
12	72	0.0223	0.0258	0.0216

## Sheet: Incarvillea arguta 
Incarvillea arguta		imbibition weight (g)
number	time (h)	A	B	C
1	0	0.005	0.0037	0.0046
2	2	0.0081	0.0078	0.0086
3	4	0.0093	0.0094	0.0085
4	6	0.0119	0.0095	0.0081
5	8	0.013	0.0098	0.0087
6	10	0.0137	0.0084	0.0099
7	12	0.0135	0.0114	0.0097
8	24	0.0136	0.0123	0.0124
9	36	0.0139	0.0123	0.0137
10	48	0.0139	0.0123	0.0137
11	60	0.0138	0.0123	0.0137
12	72	0.014	0.012	0.0136

## Sheet: Berberis concolor
Berberis concolor		imbibition weight (g)
number	time (h)	A	B	C
1	0	0.101	0.1183	0.11
2	2	0.1135	0.1316	0.1223
3	4	0.1168	0.136	0.1262
4	6	0.1259	0.1474	0.1384
5	8	0.1337	0.1613	0.147
6	10	0.1479	0.1753	0.1563
7	12	0.1763	0.2036	0.1824
8	24	0.1924	0.2198	0.207
9	36	0.2023	0.2239	0.2145
10	48	0.2054	0.2238	0.213
11	60	0.2084	0.2238	0.2186
12	72	0.2084	0.2238	0.2186
